# Supplementary figures and images for: Environmental enrichment alleviates the deleterious effects of stress in experimental autoimmune encephalomyelitis
Source: PubMed Central journal article supplement — Mult Scler J Exp Transl Clin. 2020 Oct 8;6(4):2055217320959806. doi: 10.1177/2055217320959806 (PMC7550951; doi:10.1177/2055217320959806), 2020-10-08

A

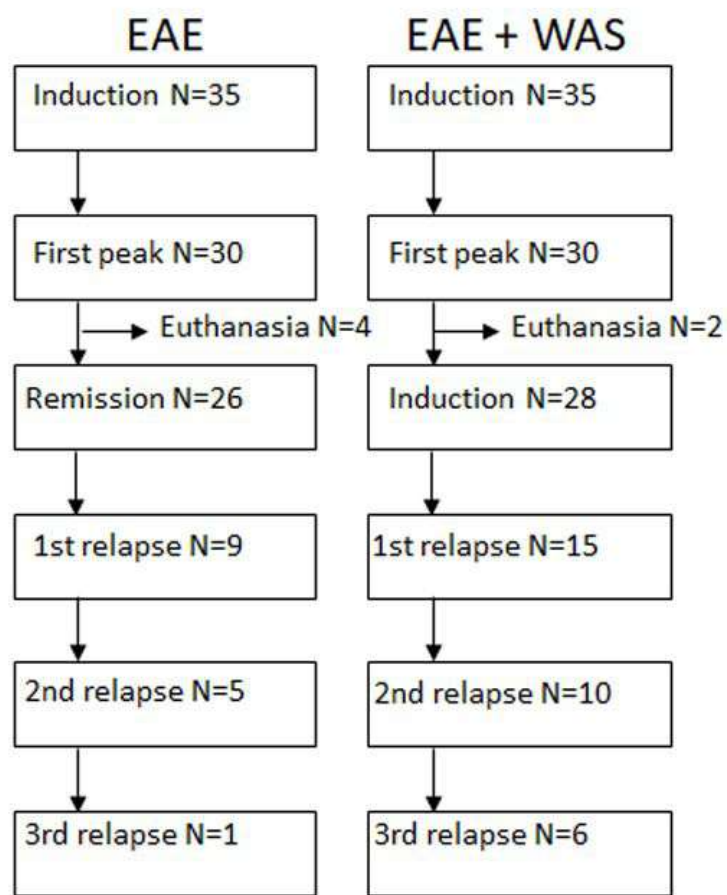

B

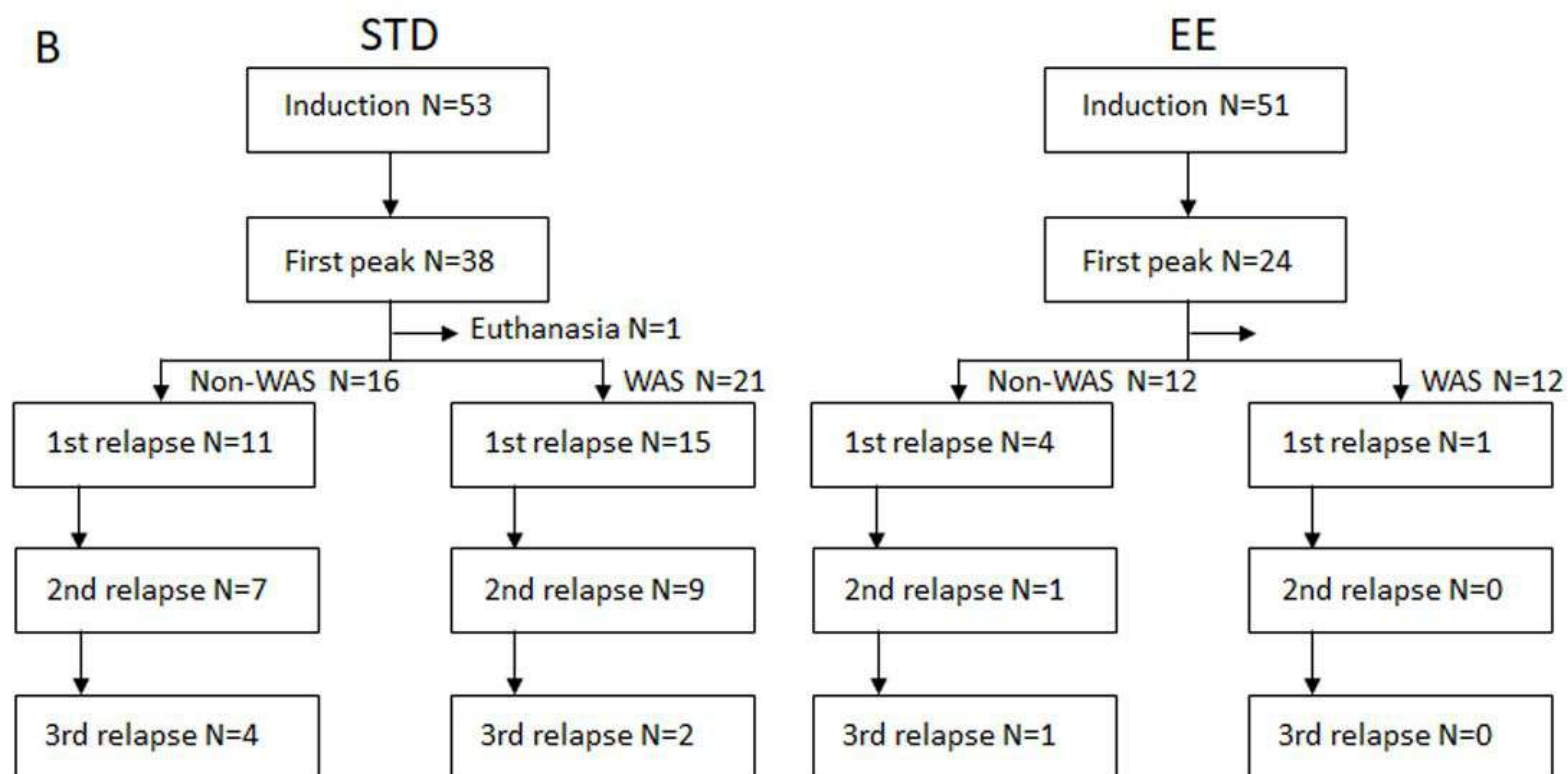

Supplement: sj-pdf-1-mso-10.1177_2055217320959806.pdf [file sj-pdf-1-mso-10.1177_2055217320959806.pdf]
